# Supplementary material
Source: PubMed Central journal article supplement (PMC4579574)
Supplement: NIHMS63571-supplement-1.pdf [file NIHMS63571-supplement-1.pdf]

## Supplementary Figures

### Supplementary figure 1

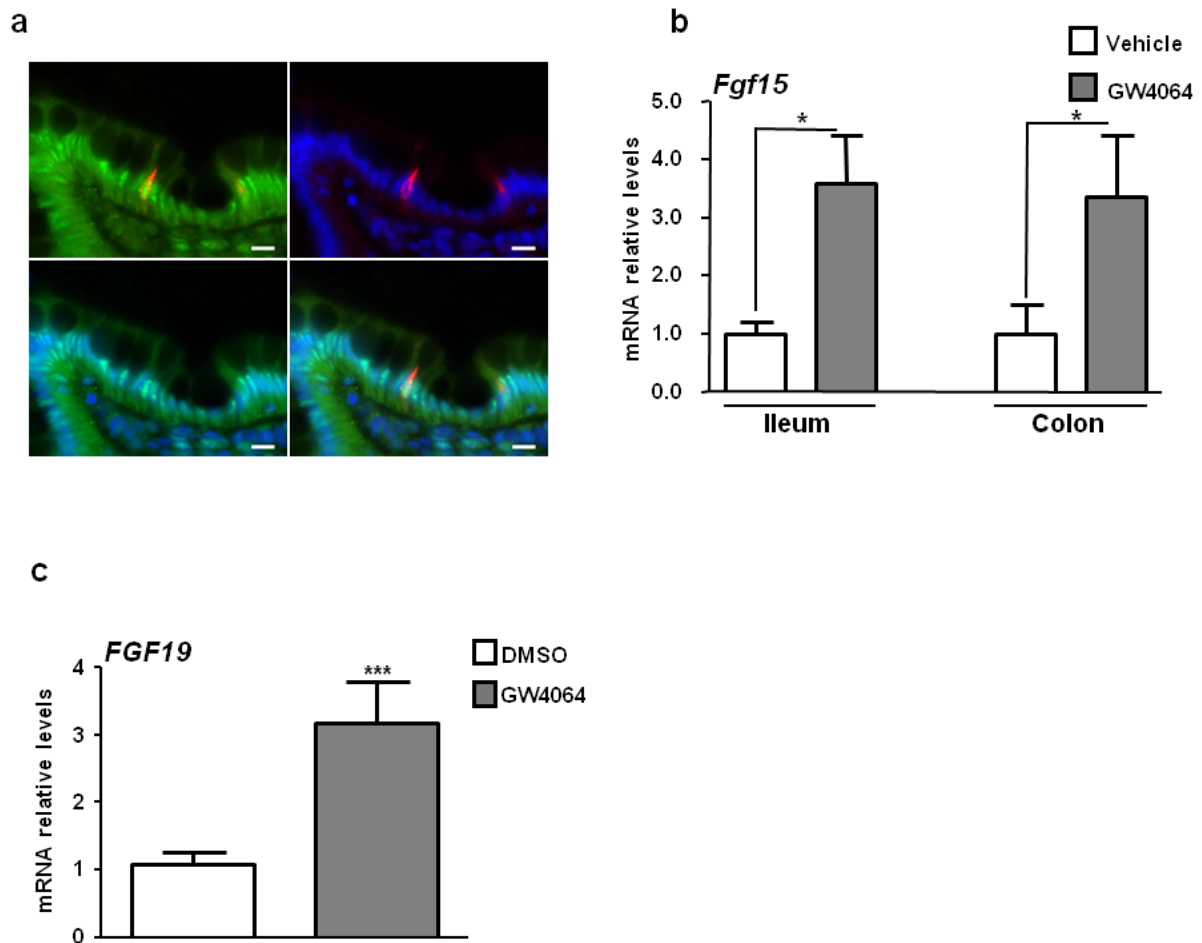

**Supplementary figure 1.** (a) Twelve  $\mu\text{m}$ -thick slices from human colonic biopsies were incubated with antibodies against FXR (in green) and GLP-1 (in red). Nuclei are in blue. This experiment is representative of 3 different FXR/GLP-1 immunostainings. Scale bar represents 100  $\mu\text{m}$ . Magnification 63X. (b) *Fgf15* qPCR on cDNA from ileum and colon of 8-week old WT mice treated by gavage for 5 days with GW4064 (30 mg/kg, n=5 mice/group). (c) *FGF19* qPCR on cDNA of human jejunal biopsies from 4 normoglycemic patients *ex vivo* treated for 16h with GW4064 ( $5 \mu\text{mol L}^{-1}$ ) (n=3/group). Data are represented as mean  $\pm$  SD. Student t test, \* $P \leq 0.05$  & \*\*\* $P \leq 0.001$ .

## Supplementary figure 2

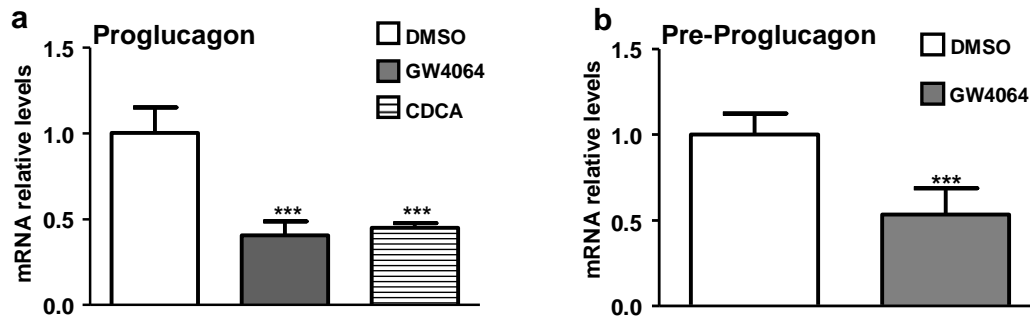

**Supplementary figure 2.** (a) Proglucagon qPCR on cDNA from GLUTag cells treated for 24h with GW4064 ( $10 \mu\text{mol L}^{-1}$ ) or CDCA ( $100 \mu\text{mol L}^{-1}$ ) ( $n=3$ ; representative of 4 different experiments). Data are represented as mean  $\pm$  SD. One-Way ANOVA followed by Tukey's post-hoc test. \*\*\* $P \leq 0.001$  vs DMSO. (b) Proglucagon pre-mRNA quantification on cDNA from GLUTag cells treated for 24h with GW4064 ( $5 \mu\text{mol L}^{-1}$ ) ( $n=3$ ; representative of 4 different experiments). Data are represented as mean  $\pm$  SD. Student t test, \*\*\* $P \leq 0.001$ .

## Supplementary figure 3

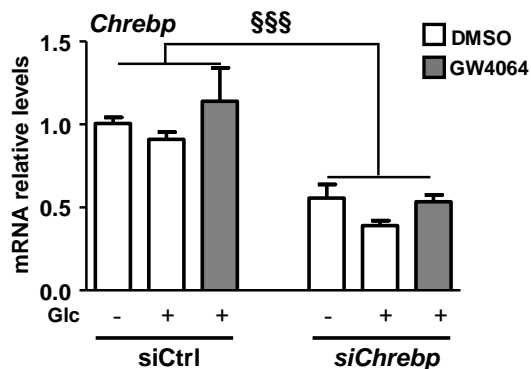

**Supplementary figure 3.** *Chrebp* qPCR on cDNA from GLUTag cells electroporated with a siCtrl or siChrebp, starved for 12h with lactate ( $10 \text{mmol L}^{-1}$ ) and then incubated for 24h in lactate  $10 \text{mmol L}^{-1}$  (Glc -) or glucose  $5.6 \text{mmol L}^{-1}$  (Glc +) media supplemented with DMSO or GW4064 ( $5 \mu\text{mol L}^{-1}$ ) ( $n=3$ ; representative of 4 different experiments). Data are represented as mean  $\pm$  SD. Two-Way ANOVA analysis followed by Bonferroni's posthoc test. §§§ $P \leq 0.001$ : effect of siChrebp in each treatment condition.

#### Supplementary figure 4

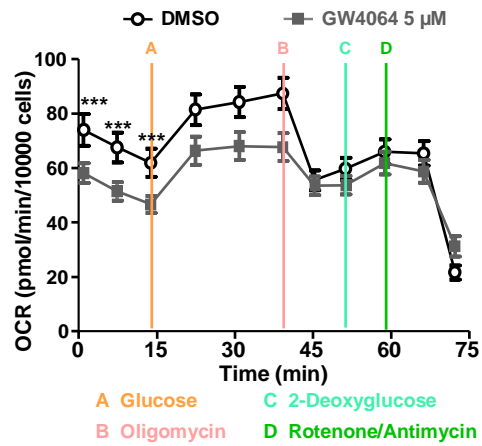

**Supplementary figure 4.** Oxygen consumption rate (OCR) after successive injection of glucose ( $10 \text{ mmol L}^{-1}$ ), oligomycin ( $1 \mu\text{mol L}^{-1}$ ), 2-deoxyglucose ( $100 \text{ mmol L}^{-1}$ ) and rotenone ( $1 \mu\text{mol L}^{-1}$ ) / antimycin A ( $1 \mu\text{mol L}^{-1}$ ) on GLUTag cells incubated 24h with DMSO or GW4064 ( $5 \mu\text{mol L}^{-1}$ ) ( $n=3$ ; representative of 4 different experiments). Data are represented as mean  $\pm$  SD. Two-Way ANOVA analysis followed by Bonferroni's posthoc test. \*\*\* $P \leq 0.001$ : effect of GW4064 on OCR from  $t=0$ min to  $t=15$ min.

Supplementary figure 5

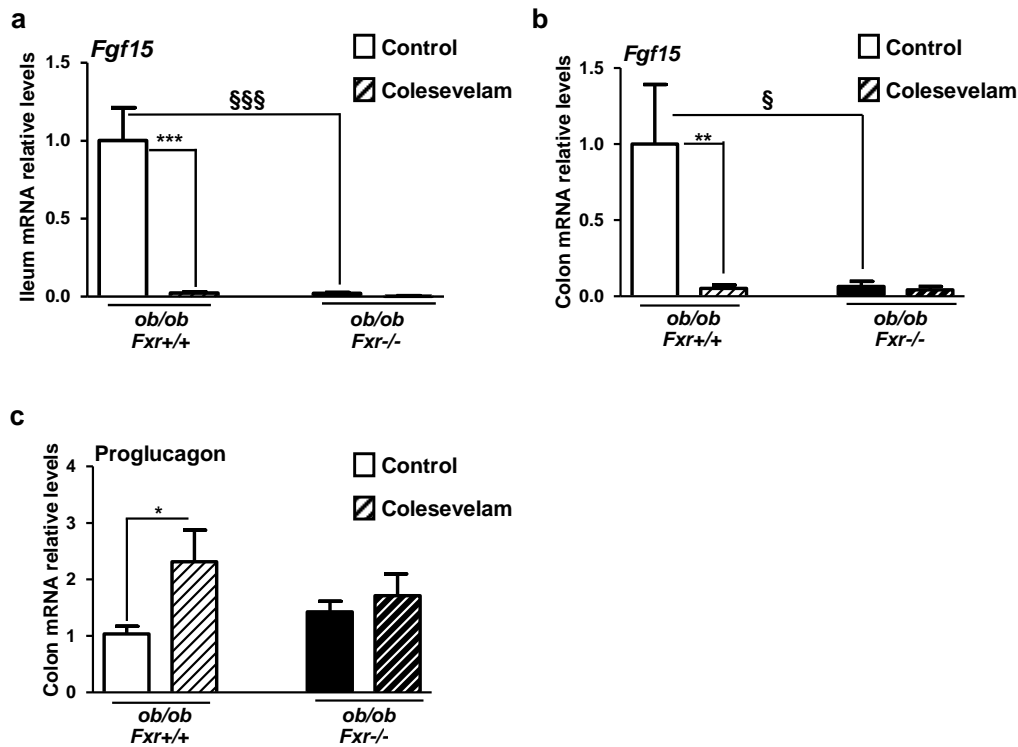

**Supplementary figure 5.** *Fgf15* qPCR on cDNA from ileum (a) or from colon (b) of 8 week-old *Fxr+/+*, *Fxr-/-* male mice on an *ob/ob* background fed for 2 weeks with a diet enriched or not with 2% colesevelam (n=6-7 mice/group). Data are represented as mean +/- SEM. (c) Proglucagon qPCR on cDNA from colon of 8 week-old *Fxr+/+*, *Fxr-/-* male mice on an *ob/ob* background fed for 2 weeks with a diet enriched or not with 2% colesevelam (n=6-7 mice/group). Data are represented as mean +/- SEM. Two-Way ANOVA analysis followed by Bonferroni's posthoc test. \* $P \leq 0.05$ , \*\* $P \leq 0.01$  and \*\*\* $P \leq 0.001$ : effect of Colesevelam treatment on gene expression in each genotype. § $P \leq 0.05$  and §§§ $P \leq 0.001$ : effect of FXR-deficiency on gene expression in each treatment condition.
